# Supplementary material for: Decline in Pneumococcal Disease Attenuated in Older Adults and Those With Comorbidities Following Universal Childhood PCV13 Immunization
Source: PubMed Central journal article supplement — Clin Infect Dis. 2018 Sep 20;68(11):1831–8. doi: 10.1093/cid/ciy800 (PMC6522679; doi:10.1093/cid/ciy800), 2018-09-20
Supplement: ciy800_suppl_supplementary_appendix_b.pdf [file ciy800_suppl_supplementary_appendix_b.pdf]

## ONLINE SUPPLEMENT – APPENDIX B: ALGORITHMS AND CODES FOR IDENTIFYING CHRONIC CONDITIONS & IMMUNOCOMPROMISING CONDITIONS

**Appendix B. Diagnosis, procedure, and drug codes for algorithms identifying baseline chronic conditions**

| Condition             | ICD-9-CM                 |                                                                                              | HCPCS                                                                    |                                                                                    | Rx                                                                                                                                     | Algorithms                                             |                                            |
|-----------------------|--------------------------|----------------------------------------------------------------------------------------------|--------------------------------------------------------------------------|------------------------------------------------------------------------------------|----------------------------------------------------------------------------------------------------------------------------------------|--------------------------------------------------------|--------------------------------------------|
|                       | Codes                    | Description                                                                                  | Codes                                                                    | Description                                                                        |                                                                                                                                        |                                                        |                                            |
| Chronic Heart Disease | 393-398                  | Chronic rheumatic heart disease                                                              |                                                                          |                                                                                    |                                                                                                                                        |                                                        |                                            |
|                       | 402                      | Hypertensive heart disease, with and without heart failure                                   |                                                                          |                                                                                    |                                                                                                                                        |                                                        |                                            |
|                       | 404                      | Hypertensive heart/kidney disease, with and without heart failure                            |                                                                          |                                                                                    |                                                                                                                                        |                                                        |                                            |
|                       | 410.xx                   | Acute myocardial infarction                                                                  | 33510-516                                                                | Coronary artery bypass, vein only                                                  |                                                                                                                                        |                                                        |                                            |
|                       | 411.xx                   | Other acute and subacute forms of ischemic heart disease                                     | 33510-516                                                                | Coronary artery bypass, vein only                                                  |                                                                                                                                        |                                                        |                                            |
|                       | 412.xx                   | Old myocardial infarction                                                                    | 33517-523                                                                | Coronary artery bypass, using venous graft(s) and arterial graft(s)                |                                                                                                                                        |                                                        |                                            |
|                       | 413.xx                   | Angina pectoris                                                                              | 33530                                                                    | Reoperation, coronary artery bypass procedure or valve procedure                   |                                                                                                                                        |                                                        |                                            |
|                       | 414.xx                   | Coronary atherosclerosis                                                                     | 33533-36                                                                 | Coronary artery bypass, using arterial graft(s); single or multiple arterial graft |                                                                                                                                        | Within two years prior to subject quarter:             |                                            |
|                       | 416                      | Chronic pulmonary heart disease                                                              | 92980-82                                                                 | Insert intracoronary stent                                                         |                                                                                                                                        | >=2 outpatient Dx (>=7 days apart) or                  |                                            |
|                       | 424.x                    | Other diseases of endocardium                                                                | 92982, 92984                                                             | Coronary artery dilation                                                           |                                                                                                                                        | >=1 inpatient Dx or                                    |                                            |
|                       | 425.x                    | Cardiomyopathy                                                                               | 92920-92944                                                              | Emergency cardiac procedure                                                        |                                                                                                                                        | >=1 Procedure                                          |                                            |
|                       | 428.x                    | Heart failure                                                                                | 92995-96                                                                 | Coronary atherectomy or add-on                                                     |                                                                                                                                        |                                                        |                                            |
|                       | 429.7x                   | Certain sequelae of myocardial infarction                                                    |                                                                          |                                                                                    |                                                                                                                                        |                                                        |                                            |
|                       | 36.0                     | Removal of coronary artery obstruction and insertion of stent(s)                             |                                                                          |                                                                                    |                                                                                                                                        |                                                        |                                            |
|                       | 36.1                     | Bypass aasastomosis for heart revascularization                                              |                                                                          |                                                                                    |                                                                                                                                        |                                                        |                                            |
|                       | 36.2                     | Heart revascularization by arterial implant                                                  |                                                                          |                                                                                    |                                                                                                                                        |                                                        |                                            |
|                       | 36.3                     | Other heart revascularization                                                                |                                                                          |                                                                                    |                                                                                                                                        |                                                        |                                            |
|                       | Congenital heart disease | 745.xx                                                                                       | Bulbus cordis anomalies and anomalies of cardiac septal closure          |                                                                                    |                                                                                                                                        |                                                        |                                            |
|                       |                          | 746.xx                                                                                       | Other congenital anomalies of heart; excludes endocardial fibroelastosis |                                                                                    |                                                                                                                                        |                                                        |                                            |
|                       |                          | 747.1                                                                                        | Coarctation of aorta                                                     |                                                                                    |                                                                                                                                        |                                                        |                                            |
| Chronic lung disease  | 277.0                    | Cystic fibrosis                                                                              |                                                                          |                                                                                    |                                                                                                                                        |                                                        |                                            |
|                       | 416.8                    | Other chronic pulmonary heart diseases                                                       |                                                                          |                                                                                    |                                                                                                                                        |                                                        |                                            |
|                       | 416.9                    | Chronic pulmonary heart disease, unspecified                                                 |                                                                          |                                                                                    |                                                                                                                                        |                                                        |                                            |
|                       | 490                      | Bronchitis, not specified as acute or chronic                                                |                                                                          |                                                                                    |                                                                                                                                        |                                                        |                                            |
|                       | 491                      | Chronic bronchitis                                                                           |                                                                          |                                                                                    |                                                                                                                                        |                                                        |                                            |
|                       | 492                      | Emphysema                                                                                    |                                                                          |                                                                                    |                                                                                                                                        | Within two years prior to subject quarter:             |                                            |
|                       | 494                      | Bronchiectasis                                                                               |                                                                          |                                                                                    |                                                                                                                                        | >=2 outpatient Dx (>=7 days apart) or                  |                                            |
|                       | 496                      | Chronic airway obstruction, not elsewhere classified                                         |                                                                          |                                                                                    |                                                                                                                                        | >=1 inpatient Dx                                       |                                            |
|                       | 500-505                  | Pneumoconiosis                                                                               |                                                                          |                                                                                    |                                                                                                                                        |                                                        |                                            |
|                       | 506.4                    | Chronic respiratory conditions due to fumes and vapors                                       |                                                                          |                                                                                    |                                                                                                                                        |                                                        |                                            |
|                       | 515                      | Postinflammatory pulmonary fibrosis                                                          |                                                                          |                                                                                    |                                                                                                                                        |                                                        |                                            |
|                       | 516                      | Other alveolar and parietoalveolar pneumonopathy                                             |                                                                          |                                                                                    |                                                                                                                                        |                                                        |                                            |
|                       | 518.83                   | Chronic respiratory failure                                                                  |                                                                          |                                                                                    |                                                                                                                                        |                                                        |                                            |
|                       | 518.84                   | Acute and chronic respiratory failure                                                        |                                                                          |                                                                                    |                                                                                                                                        |                                                        |                                            |
|                       | 770.7                    | Chronic respiratory disease arising in perinatal period (incl. bronchio pulmonary dysplasia) |                                                                          |                                                                                    |                                                                                                                                        |                                                        |                                            |
|                       | Asthma                   |                                                                                              |                                                                          |                                                                                    |                                                                                                                                        |                                                        | Within two years prior to subject quarter: |
| 493.xx                |                          | Asthma                                                                                       |                                                                          |                                                                                    |                                                                                                                                        | >=2 outpatient Dx (>=7 days apart) or >=1 inpatient Dx |                                            |
| Diabetes              | 249.xx                   | Secondary diabetes mellitus                                                                  |                                                                          |                                                                                    | Antidiabetics (insulin, alpha-glucosidase inhibitors, biguanides, sulfonyleureas, nonsulfonyleurea, secretagogues, thiazolidinediones) | Within two years prior to subject quarter:             |                                            |
|                       | 250.xx                   | Diabetes mellitus                                                                            |                                                                          |                                                                                    |                                                                                                                                        | >=2 outpatient Dx (>=7 days apart) or                  |                                            |
|                       | 357.2                    | Polyneuropathy in diabetes                                                                   |                                                                          |                                                                                    |                                                                                                                                        | >=1 inpatient Dx or Rx claim                           |                                            |
|                       | 362.0x                   | Diabetic retinopathy                                                                         |                                                                          |                                                                                    |                                                                                                                                        |                                                        |                                            |
|                       | 366.41                   | Diabetic cataract                                                                            |                                                                          |                                                                                    |                                                                                                                                        |                                                        |                                            |
|                       | 648.0                    | Other current conditions in mother...Diabetes mellitus (excludes gestational)                |                                                                          |                                                                                    |                                                                                                                                        |                                                        |                                            |
|                       | E932.3                   | Adverse effects...Insulins and antidiabetic agents                                           |                                                                          |                                                                                    |                                                                                                                                        |                                                        |                                            |

**Appendix B. Diagnosis, procedure, and drug codes for algorithms identifying baseline chronic conditions (Cont.)**

| Condition             | ICD-9-CM |                                                                                                                                                                                                                                                                                                                                                                                | HCPCS       |                                                                                                                                                                                                                         | Rx                                                                 | Algorithms                                                                                                                          |
|-----------------------|----------|--------------------------------------------------------------------------------------------------------------------------------------------------------------------------------------------------------------------------------------------------------------------------------------------------------------------------------------------------------------------------------|-------------|-------------------------------------------------------------------------------------------------------------------------------------------------------------------------------------------------------------------------|--------------------------------------------------------------------|-------------------------------------------------------------------------------------------------------------------------------------|
|                       | Codes    | Description                                                                                                                                                                                                                                                                                                                                                                    | Codes       | Description                                                                                                                                                                                                             |                                                                    |                                                                                                                                     |
| Alcoholism            | 291.xx   | Alcohol induced mental disorders; withdrawal delirium; alcohol induced persisting amnestic disorder; alcohol induced persisting dementia; alcohol induced psychotic disorder with hallucinations; idiosyncratic alcohol intoxication; alcohol induced psychotic disorder with delusions; Other specified alcohol induced mental disorders: withdrawal; sleep disorders; other. |             |                                                                                                                                                                                                                         | Alcohol deterrents (acamprosate, antabuse, disulfiram, naltrexone) | Within two years prior to subject quarter:<br>≥2 outpatient Dx (≥7 days apart) or<br>≥1 inpatient Dx or Rx claim                    |
|                       | 303      | Alcohol dependence syndrome                                                                                                                                                                                                                                                                                                                                                    |             |                                                                                                                                                                                                                         |                                                                    |                                                                                                                                     |
|                       | 303.9    | Other and unspecified alcohol dependence                                                                                                                                                                                                                                                                                                                                       |             |                                                                                                                                                                                                                         |                                                                    |                                                                                                                                     |
|                       | V11.3    | Alcoholism                                                                                                                                                                                                                                                                                                                                                                     |             |                                                                                                                                                                                                                         |                                                                    |                                                                                                                                     |
| Chronic liver disease | 571.xx   | Chronic liver disease and cirrhosis; alcoholic fatty liver; acute alcoholic hepatitis; alcoholic cirrhosis of liver; alcoholic liver damage, unspecified; chronic hepatitis; cirrhosis of liver without mention of alcohol; biliary cirrhosis; other chronic nonalcoholic liver disease; unspecified chronic liver disease without mention of alcohol                          | 37140-37183 | Venous anastomosis, opn prctvl; venous anastmsis,opn; renoprft; vnous anastomosis,opn cvl-mes; vnous anastomosi,opn splen,prx; vnous anastmosi,opn splen,dstl; insert hepatic shunt (tips); remove hepatic shunt (tips) |                                                                    |                                                                                                                                     |
|                       | 572.xx   | Liver abscess and sequelae of chronic liver disease; abscess of liver; portal pyemia; hepatic coma; portal hypertension; hepatorenal syndrome; other sequelae of chronic liver disease                                                                                                                                                                                         | 43204-205   | Esophagus endoscopy & inject; endoscopy/ligation                                                                                                                                                                        |                                                                    | Within two years prior to subject quarter:<br>≥2 outpatient Dx (≥7 days apart) or<br>≥1 inpatient Dx or<br>≥1 procedure             |
|                       | 573.0    | Chronic passive congestion of liver                                                                                                                                                                                                                                                                                                                                            |             |                                                                                                                                                                                                                         |                                                                    |                                                                                                                                     |
|                       | 456.0    | Esophageal varices with bleeding                                                                                                                                                                                                                                                                                                                                               | 43243-244   | Upper GI endoscopy & inject; endoscopy/ligation                                                                                                                                                                         |                                                                    |                                                                                                                                     |
|                       | 456.1    | Esophageal varices without mention of bleeding                                                                                                                                                                                                                                                                                                                                 | 43400       | Ligate esophagus veins                                                                                                                                                                                                  |                                                                    |                                                                                                                                     |
|                       | 456.2    | Esophageal varices in diseases classified elsewhere                                                                                                                                                                                                                                                                                                                            |             |                                                                                                                                                                                                                         |                                                                    |                                                                                                                                     |
|                       | 39.1     | Operations on the cardiovascular system, other operations on vessels, intra-abdominal venous shunt                                                                                                                                                                                                                                                                             |             |                                                                                                                                                                                                                         |                                                                    |                                                                                                                                     |
|                       | 42.91    | Operations on esophagus, ligation of esophageal varices                                                                                                                                                                                                                                                                                                                        |             |                                                                                                                                                                                                                         |                                                                    |                                                                                                                                     |
| Smokers               | 305.1    | Tobacco use disorder                                                                                                                                                                                                                                                                                                                                                           | 99406-99407 | Smoking cessation counseling                                                                                                                                                                                            |                                                                    | Within two years prior to subject quarter:<br>≥2 outpatient Dx (≥7 days apart) or<br>≥1 inpatient Dx or<br>≥1 procedure or Rx claim |
|                       | V15.82   | History of tobacco use                                                                                                                                                                                                                                                                                                                                                         |             |                                                                                                                                                                                                                         | Smoking deterrents (varenicline, nicotine replacement products)    |                                                                                                                                     |
|                       | 649.0    | Tobacco use disorder complicating pregnancy, childbirth, or the puerperium                                                                                                                                                                                                                                                                                                     |             |                                                                                                                                                                                                                         |                                                                    |                                                                                                                                     |
| Down's Syndrome       | 758.0    |                                                                                                                                                                                                                                                                                                                                                                                |             |                                                                                                                                                                                                                         |                                                                    | Within two years prior to subject quarter:<br>≥2 outpatient Dx (≥7 days apart) or<br>≥1 inpatient Dx                                |

**Appendix B. Diagnosis, procedure, and drug codes for algorithms identifying baseline immunocompromising conditions**

| Condition                                        | ICD-9-CM                                                                       |                                                                                                                                                                                                                                                                                                                                                                           | HCPCS                                                                                       |                                                                                                                                                                                                 | Rx                                                                                                                                                                              | Algorithms                                                                                                                  |
|--------------------------------------------------|--------------------------------------------------------------------------------|---------------------------------------------------------------------------------------------------------------------------------------------------------------------------------------------------------------------------------------------------------------------------------------------------------------------------------------------------------------------------|---------------------------------------------------------------------------------------------|-------------------------------------------------------------------------------------------------------------------------------------------------------------------------------------------------|---------------------------------------------------------------------------------------------------------------------------------------------------------------------------------|-----------------------------------------------------------------------------------------------------------------------------|
|                                                  | Codes                                                                          | Description                                                                                                                                                                                                                                                                                                                                                               | Codes                                                                                       | Description                                                                                                                                                                                     |                                                                                                                                                                                 |                                                                                                                             |
| Functional or Anatomic Asplenia                  |                                                                                |                                                                                                                                                                                                                                                                                                                                                                           |                                                                                             |                                                                                                                                                                                                 |                                                                                                                                                                                 |                                                                                                                             |
| Asplenia                                         | 41.5                                                                           | Operations on bone marrow and spleen, total splenectomy                                                                                                                                                                                                                                                                                                                   | 38100<br>38102<br>38120                                                                     | Removal of spleen, total<br>Removal of spleen, total<br>Laparoscopy, splenectomy                                                                                                                |                                                                                                                                                                                 |                                                                                                                             |
| Sickle cell disease and other hemoglobinopathies | 282.4<br>282.5<br>282.6<br>282.7<br>284.x<br>289.4<br>289.5x<br>759.0<br>759.3 | Thalassemias<br>Sickle-cell trait<br>Sickle-cell disease<br>Other hemoglobinopathies<br>Aplastic anemia and other bone marrow failure syndromes<br>Hypersplenism<br>Other diseases of spleen<br>Congenital syndromes (incl. ivemark)<br>Situs Inversus                                                                                                                    |                                                                                             |                                                                                                                                                                                                 |                                                                                                                                                                                 | Within two years prior to subject quarter:<br>>=2 outpatient Dx (>=7 days apart) or<br>>=1 inpatient Dx or<br>>=1 procedure |
| HIV infection                                    |                                                                                |                                                                                                                                                                                                                                                                                                                                                                           |                                                                                             |                                                                                                                                                                                                 | Anti-HIV (protease inhibitors, nucleoside/nucleotide reverse transcriptase inhibitors, non-nucleoside reverse transcriptase inhibitors, entry inhibitors, integrase inhibitors) | Within two years prior to subject quarter:<br>>=2 outpatient Dx (>=7 days apart) or<br>>=1 inpatient Dx or<br>>=1 Rx        |
|                                                  | 042, V08                                                                       | Human immunodeficiency virus (HIV)                                                                                                                                                                                                                                                                                                                                        |                                                                                             |                                                                                                                                                                                                 |                                                                                                                                                                                 |                                                                                                                             |
| Chronic renal failure                            | 585.3 - 585.9<br>586<br>V42.0<br>V45.1<br>V56.x<br>54.98<br>581.xx             | Chronic kidney disease (Stage III, Stage IV, Stage V, ESRD, Unspecified)<br>Renal failure, unspecified<br>Organ or tissue replaced by transplant, kidney<br>Renal dialysis status<br>Encounter for dialysis and dialysis catheter care<br>Peritoneal dialysis<br>Nephrotic syndrome                                                                                       | 36800-821<br>90955-99<br>93990<br>99512<br>(2006-2008) 90918-90921; (2009-2010) 90951-90962 | Vascular access for hemodialysis<br>ESRD, dialysis services<br>Duplex scan of hemodialysis access<br>Home visit for hemodialysis<br>ESRD-related services<br>Home visit for peritoneal dialysis |                                                                                                                                                                                 | Within two years prior to subject quarter:<br>>=2 outpatient Dx (>=7 days apart) or<br>>=1 inpatient Dx or<br>>=1 procedure |
| Nephrotic syndrome                               | 581.xx                                                                         | Nephrotic syndrome                                                                                                                                                                                                                                                                                                                                                        |                                                                                             |                                                                                                                                                                                                 |                                                                                                                                                                                 |                                                                                                                             |
| Congenital immunodeficiency                      | 279.x                                                                          | Disorders involving the immune mechanism, deficiency of humoral immunity; deficiency of cell-mediated immunity; combined immunity deficiency; unspecified immunity deficiency; autoimmune disease, not elsewhere classified                                                                                                                                               |                                                                                             |                                                                                                                                                                                                 |                                                                                                                                                                                 |                                                                                                                             |
| Diseases of white blood cells                    | 288.0x<br>288.1x                                                               | Neutropenia<br>Functional disorders of polymorphonuclear neutrophils                                                                                                                                                                                                                                                                                                      |                                                                                             |                                                                                                                                                                                                 |                                                                                                                                                                                 | Within two years prior to subject quarter:<br>>=2 outpatient Dx (>=7 days apart) or<br>>=1 inpatient Dx                     |
| Cochlear implant                                 | 20.96<br>20.97<br>20.98                                                        | Other operation on inner and middle ear, implantation or replacement of cochlear prosthetic device, not otherwise specified<br>Other operation on inner and middle ear, implantation or replacement of cochlear prosthetic device, single channel<br>Other operation on inner and middle ear, implantation or replacement of cochlear prosthetic device, multiple channel | 69930                                                                                       | Implant cochlear device                                                                                                                                                                         |                                                                                                                                                                                 | Within two years prior to subject quarter:<br>>=2 outpatient Dx (>=7 days apart) or<br>>=1 inpatient Dx or<br>>=1 procedure |

**Appendix B. Diagnosis, procedure, and drug codes for algorithms identifying baseline immunocompromising conditions (Cont.)**

| Condition                                        | ICD-9-CM                                                                                                                                                                                                                                                                                                                                                                                                                                                                                                                                                                                                                                                                                                                     |                                                                                                                                                                                                                                                                                                                                                                                  | HCPCS                          |                     | Rx                 | Algorithms                                                                                                                                                                                                                                                                                                    |
|--------------------------------------------------|------------------------------------------------------------------------------------------------------------------------------------------------------------------------------------------------------------------------------------------------------------------------------------------------------------------------------------------------------------------------------------------------------------------------------------------------------------------------------------------------------------------------------------------------------------------------------------------------------------------------------------------------------------------------------------------------------------------------------|----------------------------------------------------------------------------------------------------------------------------------------------------------------------------------------------------------------------------------------------------------------------------------------------------------------------------------------------------------------------------------|--------------------------------|---------------------|--------------------|---------------------------------------------------------------------------------------------------------------------------------------------------------------------------------------------------------------------------------------------------------------------------------------------------------------|
|                                                  | Codes                                                                                                                                                                                                                                                                                                                                                                                                                                                                                                                                                                                                                                                                                                                        | Description                                                                                                                                                                                                                                                                                                                                                                      | Codes                          | Description         |                    |                                                                                                                                                                                                                                                                                                               |
| Diseases associated w/ immuno Rx or radiation Tx |                                                                                                                                                                                                                                                                                                                                                                                                                                                                                                                                                                                                                                                                                                                              |                                                                                                                                                                                                                                                                                                                                                                                  |                                |                     |                    |                                                                                                                                                                                                                                                                                                               |
| Malignant neoplasms                              | 140-208<br>(except 173)                                                                                                                                                                                                                                                                                                                                                                                                                                                                                                                                                                                                                                                                                                      | Solid/blood cancers                                                                                                                                                                                                                                                                                                                                                              | Level II codes                 | Chemotherapy agents | Chemotherapy drugs | Within two years prior to subject quarter:<br>>=2 outpatient Dx (>=7 days apart) or<br>>=1 inpatient Dx or<br>>=1 procedure or<br>>=1 Rx<br>Patients with cancer will be stratified into two buckets: those with vs without evidence of chemotherapy/radiation therapy during the year prior the subject year |
|                                                  | V58.0                                                                                                                                                                                                                                                                                                                                                                                                                                                                                                                                                                                                                                                                                                                        | Encounter for other and unspecified procedures and aftercare, radiotherapy                                                                                                                                                                                                                                                                                                       | Level I Codes                  | Radiation therapy   | Immunosuppressants |                                                                                                                                                                                                                                                                                                               |
|                                                  | V58.1                                                                                                                                                                                                                                                                                                                                                                                                                                                                                                                                                                                                                                                                                                                        | Encounter for antineoplastic chemotherapy and immunotherapy                                                                                                                                                                                                                                                                                                                      | Level II codes                 | Immunosuppressants  |                    |                                                                                                                                                                                                                                                                                                               |
|                                                  | V67.1                                                                                                                                                                                                                                                                                                                                                                                                                                                                                                                                                                                                                                                                                                                        | Follow-up examination, following radiotherapy                                                                                                                                                                                                                                                                                                                                    |                                |                     |                    |                                                                                                                                                                                                                                                                                                               |
|                                                  | V67.2                                                                                                                                                                                                                                                                                                                                                                                                                                                                                                                                                                                                                                                                                                                        | Follow-up examination, following chemotherapy                                                                                                                                                                                                                                                                                                                                    |                                |                     |                    |                                                                                                                                                                                                                                                                                                               |
|                                                  | 92.2x                                                                                                                                                                                                                                                                                                                                                                                                                                                                                                                                                                                                                                                                                                                        | Infusion of liquid brachytherapy radioisotope; superficial radiation; orthovoltage radiation; radioisotopic teleradiotherapy; teleradiotherapy using photons; teleradiotherapy using electrons; teleradiotherapy of other particulate radiation; implantation or insertion of radioactive elements; injection or instillation of radioisotopes; other radiotherapeutic procedure |                                |                     |                    |                                                                                                                                                                                                                                                                                                               |
|                                                  | 99.25                                                                                                                                                                                                                                                                                                                                                                                                                                                                                                                                                                                                                                                                                                                        | Injection or infusion of cancer chemotherapeutic substance                                                                                                                                                                                                                                                                                                                       |                                |                     |                    |                                                                                                                                                                                                                                                                                                               |
| Solid organ transplantation                      |                                                                                                                                                                                                                                                                                                                                                                                                                                                                                                                                                                                                                                                                                                                              |                                                                                                                                                                                                                                                                                                                                                                                  |                                |                     |                    |                                                                                                                                                                                                                                                                                                               |
| V42.81                                           | Organ or tissue replaced by transplant, bone marrow                                                                                                                                                                                                                                                                                                                                                                                                                                                                                                                                                                                                                                                                          | 38240                                                                                                                                                                                                                                                                                                                                                                            | Bone marrow/stem transplant    |                     |                    | Within two years prior to subject quarter:<br>>=2 outpatient Dx (>=7 days apart) or<br>>=1 inpatient Dx or<br>>=1 procedure                                                                                                                                                                                   |
| V42.82                                           | Organ or tissue replaced by transplant, peripheral stem cells                                                                                                                                                                                                                                                                                                                                                                                                                                                                                                                                                                                                                                                                | 38241                                                                                                                                                                                                                                                                                                                                                                            | Bone marrow/stem transplant    |                     |                    |                                                                                                                                                                                                                                                                                                               |
| V42.0                                            | Organ or tissue replaced by transplant, kidney                                                                                                                                                                                                                                                                                                                                                                                                                                                                                                                                                                                                                                                                               | 33945                                                                                                                                                                                                                                                                                                                                                                            | Transplantation of heart       |                     |                    |                                                                                                                                                                                                                                                                                                               |
| V42.1                                            | Organ or tissue replaced by transplant, heart                                                                                                                                                                                                                                                                                                                                                                                                                                                                                                                                                                                                                                                                                | 33935                                                                                                                                                                                                                                                                                                                                                                            | Transplantation, heart/lung    |                     |                    |                                                                                                                                                                                                                                                                                                               |
| V42.84                                           | Organ or tissue replaced by transplant, intestines                                                                                                                                                                                                                                                                                                                                                                                                                                                                                                                                                                                                                                                                           | 44135                                                                                                                                                                                                                                                                                                                                                                            | Intestinal allotranspl;cadaver |                     |                    |                                                                                                                                                                                                                                                                                                               |
| V42.7                                            | Organ or tissue replaced by transplant, liver                                                                                                                                                                                                                                                                                                                                                                                                                                                                                                                                                                                                                                                                                | 44136                                                                                                                                                                                                                                                                                                                                                                            | Intestinal allotranspl; living |                     |                    |                                                                                                                                                                                                                                                                                                               |
| V42.6                                            | Organ or tissue replaced by transplant, lung                                                                                                                                                                                                                                                                                                                                                                                                                                                                                                                                                                                                                                                                                 | 47135                                                                                                                                                                                                                                                                                                                                                                            | Transplantation of liver       |                     |                    |                                                                                                                                                                                                                                                                                                               |
| V42.83                                           | Organ or tissue replaced by transplant, pancreas                                                                                                                                                                                                                                                                                                                                                                                                                                                                                                                                                                                                                                                                             | 50360                                                                                                                                                                                                                                                                                                                                                                            | Transplantation of kidney      |                     |                    |                                                                                                                                                                                                                                                                                                               |
| V42.89                                           | Organ or tissue replaced by transplant, other                                                                                                                                                                                                                                                                                                                                                                                                                                                                                                                                                                                                                                                                                | 5,036,050,365                                                                                                                                                                                                                                                                                                                                                                    | Transplantation of kidney      |                     |                    |                                                                                                                                                                                                                                                                                                               |
| V42.9                                            | Organ or tissue replaced by transplant, unspecified organ or tissue                                                                                                                                                                                                                                                                                                                                                                                                                                                                                                                                                                                                                                                          | 38999                                                                                                                                                                                                                                                                                                                                                                            | Blood/lymph system procedure   |                     |                    |                                                                                                                                                                                                                                                                                                               |
| 41.0x                                            | Operations on bone marrow and spleen; bone marrow or hematopoietic stem cell transplant; bone marrow transplant, not otherwise specified; autologous bone marrow transplant without purging; allogeneic bone marrow transplant with purging; allograft of bone marrow with in vitro removal (purging) of T-cells; allogeneic bone marrow transplant without purging; allograft of bone marrow NOS; autologous hematopoietic stem cell transplant without purging; allogeneic hematopoietic stem cell transplant without purging; cord blood stem cell transplant; autologous hematopoietic stem cell transplant with purging; allogeneic hematopoietic stem cell transplant; autologous bone marrow transplant with purging. |                                                                                                                                                                                                                                                                                                                                                                                  |                                |                     |                    |                                                                                                                                                                                                                                                                                                               |
| 37.5                                             | Heart replacement procedures                                                                                                                                                                                                                                                                                                                                                                                                                                                                                                                                                                                                                                                                                                 |                                                                                                                                                                                                                                                                                                                                                                                  |                                |                     |                    |                                                                                                                                                                                                                                                                                                               |
| 33.6                                             | Combined heart-lung transplantation                                                                                                                                                                                                                                                                                                                                                                                                                                                                                                                                                                                                                                                                                          |                                                                                                                                                                                                                                                                                                                                                                                  |                                |                     |                    |                                                                                                                                                                                                                                                                                                               |
| 46.97                                            | Transplant of intestine                                                                                                                                                                                                                                                                                                                                                                                                                                                                                                                                                                                                                                                                                                      |                                                                                                                                                                                                                                                                                                                                                                                  |                                |                     |                    |                                                                                                                                                                                                                                                                                                               |
| 50.59                                            | Other transplant of liver                                                                                                                                                                                                                                                                                                                                                                                                                                                                                                                                                                                                                                                                                                    |                                                                                                                                                                                                                                                                                                                                                                                  |                                |                     |                    |                                                                                                                                                                                                                                                                                                               |
| 33.5                                             | Lung transplant                                                                                                                                                                                                                                                                                                                                                                                                                                                                                                                                                                                                                                                                                                              |                                                                                                                                                                                                                                                                                                                                                                                  |                                |                     |                    |                                                                                                                                                                                                                                                                                                               |
| 33.51                                            | Unilateral lung transplantation                                                                                                                                                                                                                                                                                                                                                                                                                                                                                                                                                                                                                                                                                              |                                                                                                                                                                                                                                                                                                                                                                                  |                                |                     |                    |                                                                                                                                                                                                                                                                                                               |
| 33.52                                            | Bilateral lung transplantation                                                                                                                                                                                                                                                                                                                                                                                                                                                                                                                                                                                                                                                                                               |                                                                                                                                                                                                                                                                                                                                                                                  |                                |                     |                    |                                                                                                                                                                                                                                                                                                               |
| 55.69                                            | Other kidney transplantation                                                                                                                                                                                                                                                                                                                                                                                                                                                                                                                                                                                                                                                                                                 |                                                                                                                                                                                                                                                                                                                                                                                  |                                |                     |                    |                                                                                                                                                                                                                                                                                                               |
| 41.94                                            | Transplantation of spleen                                                                                                                                                                                                                                                                                                                                                                                                                                                                                                                                                                                                                                                                                                    |                                                                                                                                                                                                                                                                                                                                                                                  |                                |                     |                    |                                                                                                                                                                                                                                                                                                               |
| 52.8                                             | Transplant of pancreas                                                                                                                                                                                                                                                                                                                                                                                                                                                                                                                                                                                                                                                                                                       |                                                                                                                                                                                                                                                                                                                                                                                  |                                |                     |                    |                                                                                                                                                                                                                                                                                                               |
