# Supplementary material for: Decline in Pneumococcal Disease Attenuated in Older Adults and Those With Comorbidities Following Universal Childhood PCV13 Immunization
Source: PubMed Central journal article supplement — Clin Infect Dis. 2018 Sep 20;68(11):1831–8. doi: 10.1093/cid/ciy800 (PMC6522679; doi:10.1093/cid/ciy800), 2018-09-20
Supplement: ciy800_suppl_supplementary_appendix_c.pdf [file ciy800_suppl_supplementary_appendix_c.pdf]

## ONLINE SUPPLEMENT – APPENDIX C: ALGORITHMS AND CODES FOR IDENTIFYING IPD AND PNEUMONIA

**Appendix C.** Diagnosis, procedure, and drug codes for algorithms identifying IPD and PNE requiring hospitalization

| Condition                      | ICD-9-CM               |                                                        | HCPCS |             | Algorithms Episode                                                   |
|--------------------------------|------------------------|--------------------------------------------------------|-------|-------------|----------------------------------------------------------------------|
|                                | Codes                  | Description                                            | Codes | Description |                                                                      |
| <b>IPD</b>                     |                        |                                                        |       |             |                                                                      |
| Bacteremia                     | 790.7, 771.83 + 041.2  | Bacteremia + pneumococcus                              |       |             | Antibiotics                                                          |
|                                | 038.2                  | Pneumococcal septicemia                                |       |             |                                                                      |
|                                | 038.9 + 041.2          | Unspecified septicemia + pneumococcus                  |       |             |                                                                      |
| Meningitis                     | 320.1                  | Pneumococcal meningitis                                |       |             | Criteria: first listed inpatient Dx (episodes must be 90 days apart) |
|                                | 320.9 + 041.2          | Meningitis due to unspecified bacterium + pneumococcus |       |             |                                                                      |
|                                | 322.9 + 041.2          | Meningitis, unspecified + pneumococcus                 |       |             |                                                                      |
| Other                          | 421.x + 041.2          | Endocarditis + pneumococcus                            |       |             | Antibiotics                                                          |
|                                | 711.0 + 041.2          | Septic arthritis + pneumococcus                        |       |             |                                                                      |
|                                | 730.0x, 730.2x + 041.2 | Osteomyelitis + pneumococcus                           |       |             |                                                                      |
|                                |                        |                                                        |       |             |                                                                      |
| <b>Pneumonia</b>               |                        |                                                        |       |             |                                                                      |
| <b>All-Cause</b>               |                        |                                                        |       |             |                                                                      |
| Pneumonia                      | 480-486, 487.0         | Viral, bacterial, unspecified pneumonia                |       |             | Criteria: pneumonia as first listed inpatient Dx                     |
|                                | 510.x                  | Empyema                                                |       |             |                                                                      |
|                                | 511.1, 511.9           | Pleural effusion                                       |       |             |                                                                      |
| Bacteremia/respiratory failure | 038.XX                 | Septicemia                                             |       |             | Antibiotics                                                          |
|                                | 518.81                 | Acute respiratory failure                              |       |             |                                                                      |
|                                | 518.82                 | Chronic respiratory failure                            |       |             |                                                                      |
|                                | 771.81                 | Septicemia [sepsis] of newborn                         |       |             |                                                                      |
|                                | 771.83                 | Bacteremia of newborn                                  |       |             |                                                                      |
|                                | 785.52                 | Septic shock                                           |       |             |                                                                      |
|                                | 790.7X                 | Bacteremia                                             |       |             |                                                                      |
|                                | 799.1X                 | Respiratory arrest                                     |       |             |                                                                      |
|                                | 995.91                 | Sepsis                                                 |       |             |                                                                      |
|                                | 995.92                 | Severe sepsis                                          |       |             |                                                                      |
|                                | <b>Pneumococcal</b>    |                                                        |       |             |                                                                      |
| Pneumococcal pneumonia         | 481                    | Pneumococcal pneumonia                                 |       |             | Criteria: pneumococcal pneumonia as first listed inpatient Dx        |
|                                | 482.9 + 041.2          | Bacterial pneumonia, unspecified + pneumococcus        |       |             |                                                                      |
|                                | 485 + 041.2            | Bronchopneumonia, organism unspecified + pneumococcus  |       |             |                                                                      |
|                                | 486 + 041.2            | Pneumonia, organism unspecified + pneumococcus         |       |             |                                                                      |
|                                | 510.x + 041.2          | Empyema + pneumococcus                                 |       |             |                                                                      |
|                                | 511.1, 511.9 + 041.2   | Pleural effusion + pneumococcus                        |       |             |                                                                      |
| Bacteremia/respiratory failure | 038.XX                 | Septicemia                                             |       |             | Antibiotics                                                          |
|                                | 518.81                 | Acute respiratory failure                              |       |             |                                                                      |
|                                | 518.82                 | Chronic respiratory failure                            |       |             |                                                                      |
|                                | 771.81                 | Septicemia [sepsis] of newborn                         |       |             |                                                                      |
|                                | 771.83                 | Bacteremia of newborn                                  |       |             |                                                                      |
|                                | 785.52                 | Septic shock                                           |       |             |                                                                      |
|                                | 790.7X                 | Bacteremia                                             |       |             |                                                                      |
|                                | 799.1X                 | Respiratory arrest                                     |       |             |                                                                      |
|                                | 995.91                 | Sepsis                                                 |       |             |                                                                      |
|                                | 995.92                 | Severe sepsis                                          |       |             |                                                                      |
