# Supplementary material for: Decline in Pneumococcal Disease Attenuated in Older Adults and Those With Comorbidities Following Universal Childhood PCV13 Immunization
Source: PubMed Central journal article supplement — Clin Infect Dis. 2018 Sep 20;68(11):1831–8. doi: 10.1093/cid/ciy800 (PMC6522679; doi:10.1093/cid/ciy800), 2018-09-20

Online Supplement — Figure 2. Rates of all-cause pneumonia requiring hospitalization from 2007-2015, by age and risk profile

A. 18-49 Years

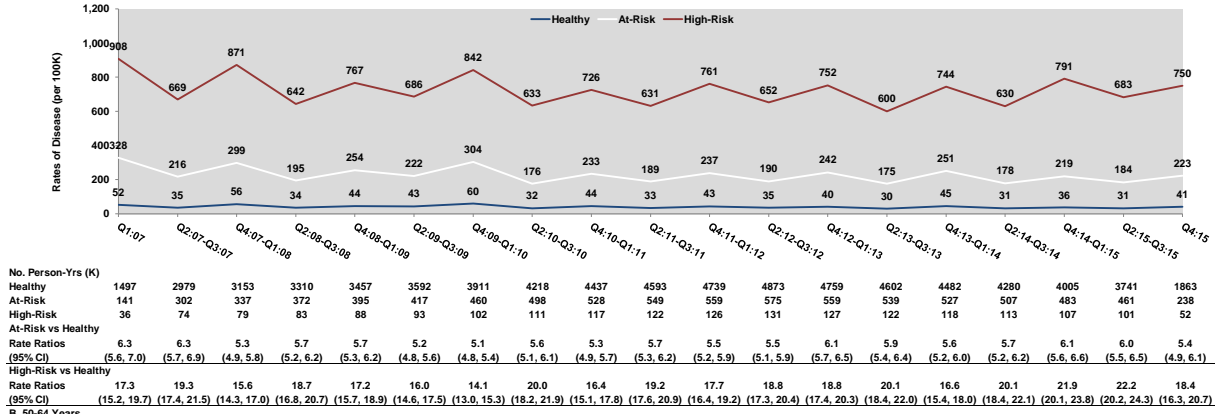

B. 50-64 Years

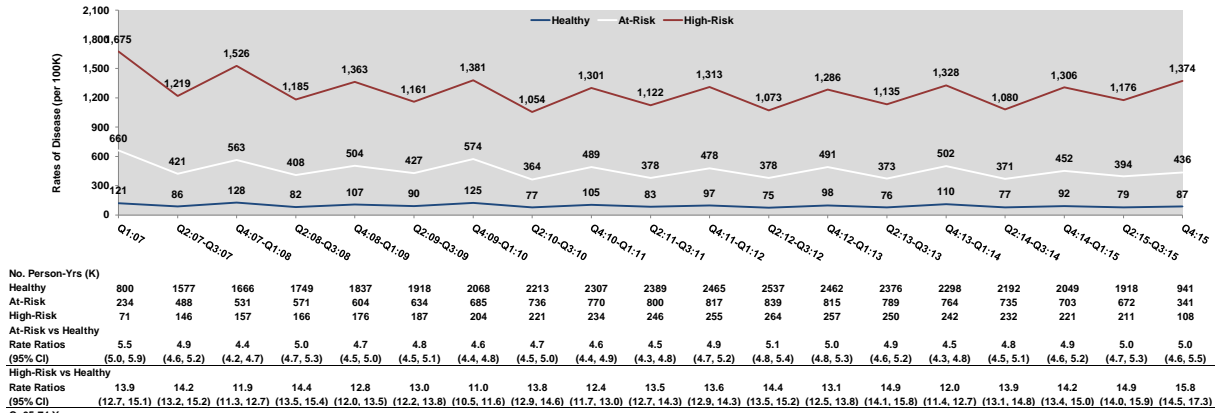

C. 65-74 Years

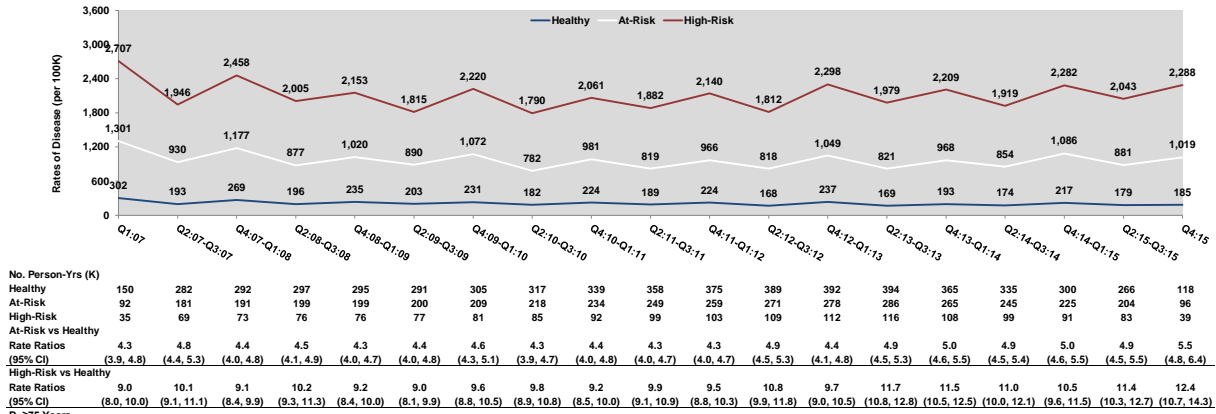

D. ≥75 Years

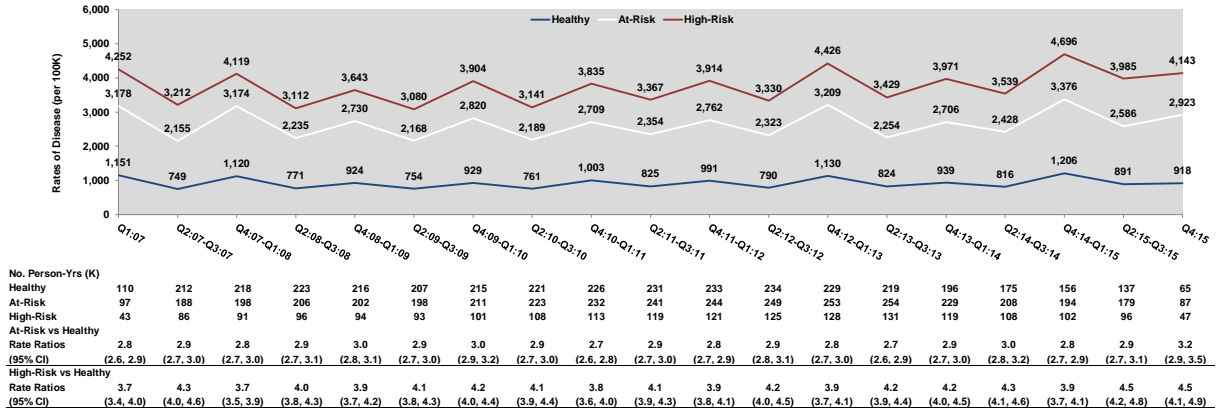

Supplement: ciy800_suppl_supplementary_figure2.pdf [file ciy800_suppl_supplementary_figure2.pdf]
