# Supplementary material for: Decline in Pneumococcal Disease Attenuated in Older Adults and Those With Comorbidities Following Universal Childhood PCV13 Immunization
Source: PubMed Central journal article supplement — Clin Infect Dis. 2018 Sep 20;68(11):1831–8. doi: 10.1093/cid/ciy800 (PMC6522679; doi:10.1093/cid/ciy800), 2018-09-20
Supplement: ciy800_suppl_supplementary_figure3.pdf [file ciy800_suppl_supplementary_figure3.pdf]

Online Supplement — Figure 3. Rates of pneumococcal pneumonia requiring hospitalization from 2007-2015, by age and risk profile

A. 18-49 Years

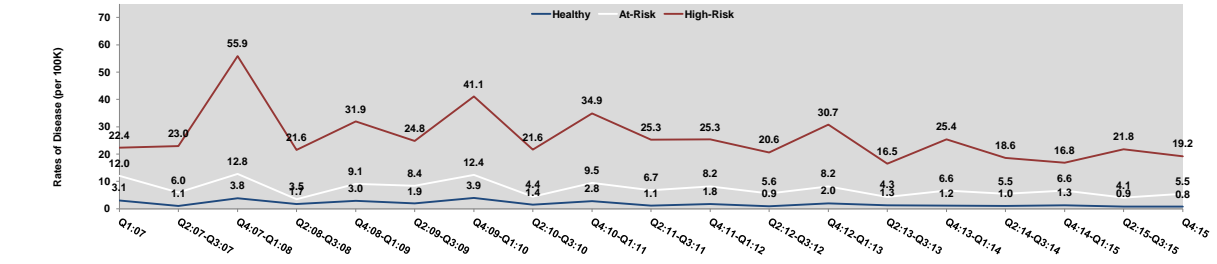

| No. Person-Yrs (K)   | Healthy     | At-Risk      | High-Risk    |
|----------------------|-------------|--------------|--------------|
| Healthy              | 1497        | 2979         | 3153         |
| At-Risk              | 141         | 302          | 337          |
| High-Risk            | 36          | 74           | 79           |
| At-Risk vs Healthy   |             |              |              |
| Rate Ratios          | 3.9         | 5.6          | 3.4          |
| (95% CI)             | (2.2, 6.8)  | (3.1, 9.9)   | (2.4, 4.8)   |
| High-Risk vs Healthy |             |              |              |
| Rate Ratios          | 7.3         | 21.4         | 14.7         |
| (95% CI)             | (3.4, 15.4) | (11.9, 38.5) | (10.4, 20.7) |

B. 50-64 Years

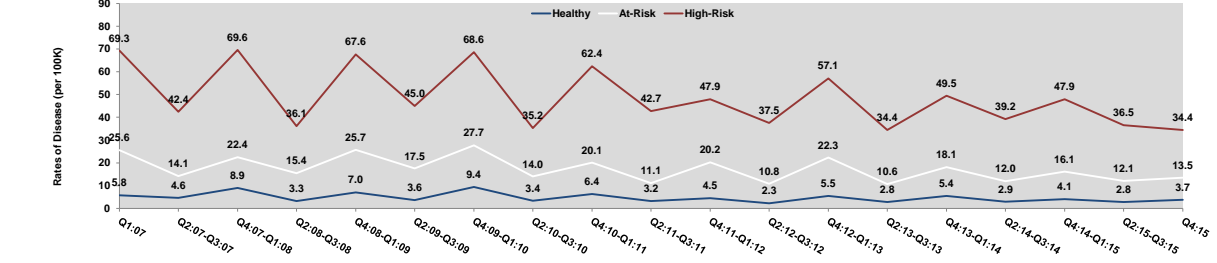

| No. Person-Yrs (K)   | Healthy     | At-Risk     | High-Risk   |
|----------------------|-------------|-------------|-------------|
| Healthy              | 800         | 1577        | 1666        |
| At-Risk              | 234         | 488         | 531         |
| High-Risk            | 71          | 146         | 157         |
| At-Risk vs Healthy   |             |             |             |
| Rate Ratios          | 4.5         | 3.1         | 2.5         |
| (95% CI)             | (3.0, 6.5)  | (2.2, 4.3)  | (2.0, 3.2)  |
| High-Risk vs Healthy |             |             |             |
| Rate Ratios          | 12.0        | 9.3         | 7.8         |
| (95% CI)             | (8.1, 18.0) | (6.6, 13.0) | (6.1, 10.0) |

C. 65-74 Years

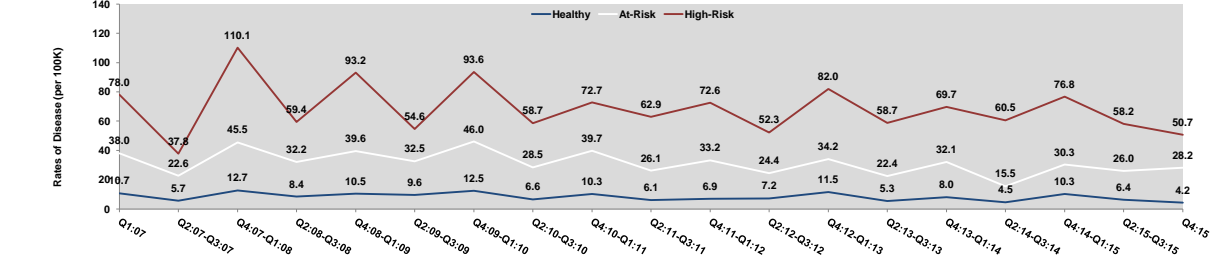

| No. Person-Yrs (K)   | Healthy     | At-Risk     | High-Risk   |
|----------------------|-------------|-------------|-------------|
| Healthy              | 150         | 282         | 292         |
| At-Risk              | 92          | 181         | 191         |
| High-Risk            | 35          | 69          | 73          |
| At-Risk vs Healthy   |             |             |             |
| Rate Ratios          | 3.5         | 4.0         | 3.6         |
| (95% CI)             | (2.0, 6.4)  | (2.2, 7.1)  | (2.4, 5.3)  |
| High-Risk vs Healthy |             |             |             |
| Rate Ratios          | 7.3         | 6.7         | 8.7         |
| (95% CI)             | (3.9, 13.5) | (3.6, 12.4) | (5.9, 12.8) |

D. ≥75 Years

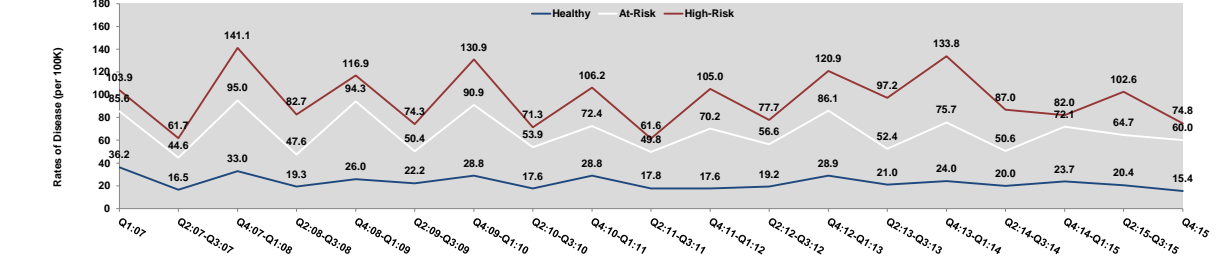

| No. Person-Yrs (K)   | Healthy    | At-Risk    | High-Risk  |
|----------------------|------------|------------|------------|
| Healthy              | 110        | 212        | 218        |
| At-Risk              | 97         | 188        | 198        |
| High-Risk            | 43         | 86         | 91         |
| At-Risk vs Healthy   |            |            |            |
| Rate Ratios          | 2.4        | 2.7        | 2.9        |
| (95% CI)             | (1.6, 3.4) | (1.8, 4.0) | (2.2, 3.8) |
| High-Risk vs Healthy |            |            |            |
| Rate Ratios          | 2.9        | 3.7        | 4.3        |
| (95% CI)             | (1.9, 4.4) | (2.4, 5.7) | (3.2, 5.7) |
