# Supplementary material for: Decline in Pneumococcal Disease Attenuated in Older Adults and Those With Comorbidities Following Universal Childhood PCV13 Immunization
Source: PubMed Central journal article supplement — Clin Infect Dis. 2018 Sep 20;68(11):1831–8. doi: 10.1093/cid/ciy800 (PMC6522679; doi:10.1093/cid/ciy800), 2018-09-20
Supplement: ciy800_suppl_supplementary_figure4.pdf [file ciy800_suppl_supplementary_figure4.pdf]

Online Supplement — Figure 4. Distribution of episodes of pneumococcal pneumonia requiring hospitalization by risk profile in 2007-2010, 2011-2012, and 2013-2015, by age

A. 18-49 Years

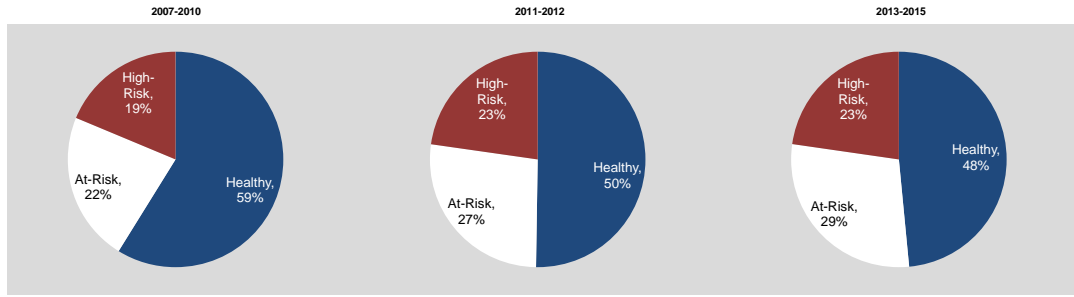

No. PP Cases  
No. Person-Years  
Rate of PP (per 100K)

|       |       |       |
|-------|-------|-------|
| 1,171 | 589   | 625   |
| 32.1M | 21.7M | 29.0M |
| 3.6   | 2.7   | 2.2   |

B. 50-64 Years

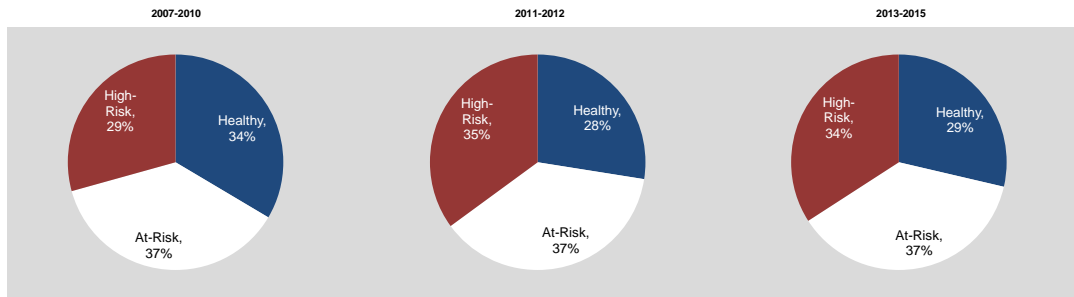

No. PP Cases  
No. Person-Years  
Rate of PP (per 100K)

|       |       |       |
|-------|-------|-------|
| 2,600 | 1,363 | 1,749 |
| 21.2M | 14.2M | 18.8M |
| 12.3  | 9.6   | 9.3   |

C. 65-74 Years

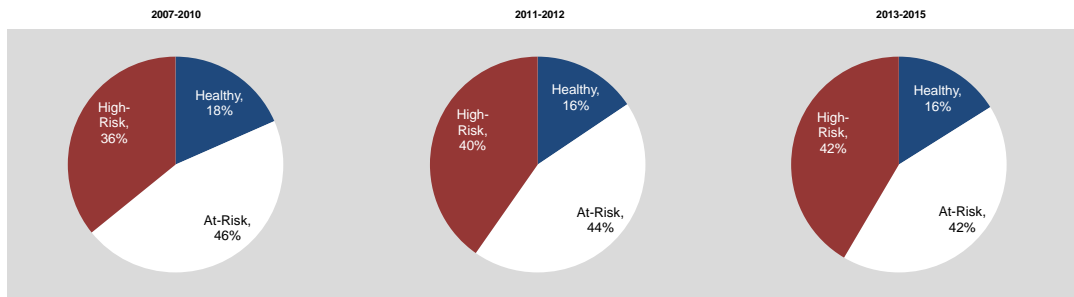

No. PP Cases  
No. Person-Years  
Rate of PP (per 100K)

|       |      |      |
|-------|------|------|
| 1,239 | 700  | 927  |
| 4.6M  | 2.9M | 4.1M |
| 27.0  | 23.8 | 22.9 |

D. ≥75 Years

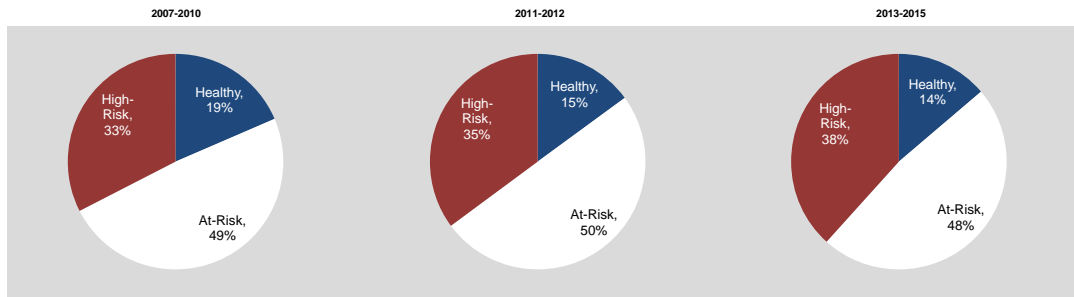

No. PP Cases  
No. Person-Years  
Rate of PP (per 100K)

|       |       |       |
|-------|-------|-------|
| 2,279 | 1,258 | 1,772 |
| 4.1M  | 2.4M  | 3.0M  |
| 55.2  | 52.5  | 58.8  |
