# Supplementary material for: Decline in Pneumococcal Disease Attenuated in Older Adults and Those With Comorbidities Following Universal Childhood PCV13 Immunization
Source: PubMed Central journal article supplement — Clin Infect Dis. 2018 Sep 20;68(11):1831–8. doi: 10.1093/cid/ciy800 (PMC6522679; doi:10.1093/cid/ciy800), 2018-09-20
Supplement: ciy800_suppl_supplementary_table1.pdf [file ciy800_suppl_supplementary_table1.pdf]

**Online Supplement — Table 1.** Characteristics of study population from 2007-2010, 2011-2012, and 2013-2015, by age

|                                      | 2007-2010, by Age (years) |       |       |       | 2011-2012, by Age (years) |       |       |       | 2013-2015, by Age (years) |       |       |       |
|--------------------------------------|---------------------------|-------|-------|-------|---------------------------|-------|-------|-------|---------------------------|-------|-------|-------|
|                                      | 18-49                     | 50-64 | 65-74 | ≥75   | 18-49                     | 50-64 | 65-74 | ≥75   | 18-49                     | 50-64 | 65-74 | ≥75   |
| Number of Person-Years (in millions) | 32.1                      | 21.2  | 4.6   | 4.1   | 21.7                      | 14.2  | 2.9   | 2.4   | 29.0                      | 18.8  | 4.1   | 3.0   |
| Sex, %                               |                           |       |       |       |                           |       |       |       |                           |       |       |       |
| Male                                 | 47.8%                     | 47.3% | 48.6% | 43.5% | 48.0%                     | 46.9% | 48.7% | 43.1% | 48.4%                     | 46.9% | 48.5% | 42.6% |
| Female                               | 52.2%                     | 52.7% | 51.4% | 56.5% | 52.0%                     | 53.1% | 51.3% | 56.9% | 51.5%                     | 53.1% | 51.5% | 57.4% |
| Risk Profile/Conditions, %           |                           |       |       |       |                           |       |       |       |                           |       |       |       |
| At-Risk                              | 9.9%                      | 22.9% | 34.8% | 39.5% | 10.4%                     | 23.1% | 35.2% | 40.9% | 10.4%                     | 23.4% | 36.2% | 42.5% |
| Chronic Heart Disease                | 1.5%                      | 7.5%  | 16.7% | 25.2% | 1.4%                      | 7.0%  | 16.0% | 25.8% | 1.2%                      | 6.6%  | 16.2% | 26.9% |
| Chronic Lung Disease                 | 0.7%                      | 2.4%  | 5.6%  | 8.6%  | 0.6%                      | 2.3%  | 5.5%  | 9.0%  | 0.6%                      | 2.3%  | 5.9%  | 10.0% |
| Asthma                               | 2.4%                      | 2.6%  | 2.7%  | 2.4%  | 2.7%                      | 2.9%  | 3.3%  | 2.8%  | 2.8%                      | 3.2%  | 3.8%  | 3.3%  |
| Diabetes                             | 3.9%                      | 12.3% | 19.4% | 18.0% | 4.1%                      | 12.6% | 20.1% | 19.6% | 4.0%                      | 12.7% | 20.6% | 21.0% |
| Alcoholism                           | 0.4%                      | 0.4%  | 0.2%  | 0.1%  | 0.4%                      | 0.4%  | 0.3%  | 0.2%  | 0.4%                      | 0.5%  | 0.3%  | 0.2%  |
| Chronic Liver Disease                | 0.2%                      | 0.5%  | 0.5%  | 0.3%  | 0.3%                      | 0.7%  | 0.6%  | 0.4%  | 0.3%                      | 0.8%  | 0.9%  | 0.5%  |
| Smokers                              | 2.2%                      | 3.4%  | 2.6%  | 1.0%  | 2.4%                      | 3.6%  | 3.1%  | 1.5%  | 2.5%                      | 4.0%  | 4.0%  | 2.3%  |
| 1 Risk Factor                        | 8.7%                      | 17.9% | 24.5% | 26.5% | 9.1%                      | 18.0% | 24.5% | 26.4% | 9.1%                      | 18.2% | 24.5% | 26.1% |
| 2 Risk Factors                       | 1.0%                      | 4.0%  | 8.1%  | 10.3% | 1.1%                      | 4.0%  | 8.2%  | 11.1% | 1.1%                      | 4.1%  | 8.7%  | 12.1% |
| ≥3 Risk Factors                      | 0.2%                      | 1.0%  | 2.2%  | 2.7%  | 0.2%                      | 1.1%  | 2.5%  | 3.3%  | 0.2%                      | 1.1%  | 3.0%  | 4.3%  |
| High-Risk                            | 2.2%                      | 6.8%  | 13.4% | 18.5% | 2.3%                      | 7.2%  | 14.1% | 20.3% | 2.3%                      | 7.4%  | 14.7% | 22.2% |
| Functional/Anatomical Asplenia       | 0.1%                      | 0.2%  | 0.3%  | 0.4%  | 0.1%                      | 0.2%  | 0.4%  | 0.5%  | 0.1%                      | 0.2%  | 0.4%  | 0.6%  |
| HIV                                  | 0.2%                      | 0.3%  | 0.1%  | 0.0%  | 0.2%                      | 0.3%  | 0.1%  | 0.0%  | 0.2%                      | 0.3%  | 0.2%  | 0.0%  |
| Chronic Renal Failure                | 0.2%                      | 0.6%  | 1.5%  | 3.5%  | 0.2%                      | 0.8%  | 2.1%  | 5.1%  | 0.2%                      | 0.8%  | 2.5%  | 6.9%  |
| Nephrotic Syndrome                   | 0.0%                      | 0.0%  | 0.0%  | 0.0%  | 0.0%                      | 0.0%  | 0.1%  | 0.0%  | 0.0%                      | 0.0%  | 0.1%  | 0.1%  |
| Immunosuppressants                   | 1.8%                      | 6.0%  | 12.2% | 16.0% | 1.8%                      | 6.2%  | 12.5% | 16.6% | 1.8%                      | 6.3%  | 12.8% | 17.5% |
| Malignant Neoplasms                  | 1.0%                      | 4.4%  | 9.8%  | 13.1% | 1.0%                      | 4.6%  | 10.0% | 13.6% | 1.0%                      | 4.6%  | 10.4% | 14.5% |
| Evidence of Treatment                | 0.3%                      | 1.3%  | 2.9%  | 3.5%  | 0.3%                      | 1.3%  | 2.8%  | 3.4%  | 0.2%                      | 1.3%  | 2.7%  | 3.4%  |
| No Evidence of Treatment             | 0.7%                      | 3.1%  | 6.9%  | 9.6%  | 0.7%                      | 3.2%  | 7.3%  | 10.2% | 0.7%                      | 3.3%  | 7.7%  | 11.1% |
| Solid Organ Transplant               | 0.1%                      | 0.2%  | 0.2%  | 0.1%  | 0.1%                      | 0.2%  | 0.3%  | 0.1%  | 0.1%                      | 0.2%  | 0.4%  | 0.1%  |
| Chronic Oral Steroid Use             | 0.7%                      | 1.6%  | 2.8%  | 3.5%  | 0.8%                      | 1.7%  | 2.8%  | 3.7%  | 0.8%                      | 1.7%  | 2.7%  | 3.6%  |
| Other                                | 0.1%                      | 0.1%  | 0.1%  | 0.1%  | 0.1%                      | 0.1%  | 0.1%  | 0.1%  | 0.1%                      | 0.1%  | 0.2%  | 0.1%  |
| Congenital Immunodeficiency          | 0.1%                      | 0.1%  | 0.1%  | 0.1%  | 0.1%                      | 0.2%  | 0.2%  | 0.1%  | 0.1%                      | 0.2%  | 0.3%  | 0.2%  |
| Diseases of White Blood Cells        | 0.1%                      | 0.3%  | 0.4%  | 0.3%  | 0.1%                      | 0.3%  | 0.4%  | 0.3%  | 0.1%                      | 0.3%  | 0.5%  | 0.4%  |
| Healthy (ie, none of the above)      | 87.9%                     | 70.3% | 51.8% | 41.9% | 87.3%                     | 69.6% | 50.7% | 38.8% | 87.3%                     | 69.2% | 49.1% | 35.3% |
