# Supplementary material for: Decline in Pneumococcal Disease Attenuated in Older Adults and Those With Comorbidities Following Universal Childhood PCV13 Immunization
Source: PubMed Central journal article supplement — Clin Infect Dis. 2018 Sep 20;68(11):1831–8. doi: 10.1093/cid/ciy800 (PMC6522679; doi:10.1093/cid/ciy800), 2018-09-20
Supplement: ciy800_suppl_supplementary_table2.pdf [file ciy800_suppl_supplementary_table2.pdf]

**Online Supplement — Table 2.** Rates and rate ratios for pneumococcal pneumonia requiring hospitalization, by age and risk profile

|                               | Rate per 100K Person-Years (95% CI) |                   |                     | Decline in Rate (95% CI) from<br>2007-2010 to |                | Rate Ratios (95% CI) vs Healthy |                   |                   |
|-------------------------------|-------------------------------------|-------------------|---------------------|-----------------------------------------------|----------------|---------------------------------|-------------------|-------------------|
|                               | 2007-2010                           | 2011-2012         | 2013-2015           | 2011-2012                                     | 2013-2015      | 2007-2010                       | 2011-2012         | 2013-2015         |
| <b>Pneumococcal Pneumonia</b> |                                     |                   |                     |                                               |                |                                 |                   |                   |
| <b>Age/Risk Profile</b>       |                                     |                   |                     |                                               |                |                                 |                   |                   |
| <b>18-49</b>                  |                                     |                   |                     |                                               |                |                                 |                   |                   |
| Healthy                       | 2.4 (2.3, 2.6)                      | 1.6 (1.4, 1.7)    | 1.2 (1.1, 1.3)      | 36% (27%, 44%)                                | 51% (44%, 57%) | —                               | —                 | —                 |
| At-Risk                       | 8.3 (7.3, 9.3)                      | 7.1 (6.0, 8.3)    | 6.0 (5.1, 6.9)      | 15% (-4%, 30%)                                | 28% (13%, 40%) | 3.4 (2.9, 3.9)                  | 4.5 (3.7, 5.5)    | 5.0 (4.1, 6.0)    |
| High-Risk                     | 30.3 (26.5, 34.6)                   | 26.4 (22.3, 31.3) | 21.1 (17.9, 24.9)   | 13% (-8%, 30%)                                | 30% (14%, 44%) | 12.4 (10.7, 14.5)               | 16.9 (13.8, 20.8) | 17.6 (14.4, 21.5) |
| <b>50-64</b>                  |                                     |                   |                     |                                               |                |                                 |                   |                   |
| Healthy                       | 5.8 (5.5, 6.2)                      | 3.8 (3.4, 4.2)    | 3.9 (3.5, 4.2)      | 35% (27%, 42%)                                | 34% (26%, 41%) | —                               | —                 | —                 |
| At-Risk                       | 19.9 (18.7, 21.2)                   | 15.6 (14.3, 17.0) | 14.8 (13.7, 16.0)   | 22% (13%, 30%)                                | 26% (18%, 33%) | 3.4 (3.1, 3.7)                  | 4.1 (3.6, 4.7)    | 3.8 (3.4, 4.3)    |
| High-Risk                     | 52.9 (49.3, 56.8)                   | 46.8 (42.8, 51.2) | 43.0 (39.7, 46.6)   | 11% (1%, 21%)                                 | 19% (9%, 27%)  | 9.0 (8.2, 10.0)                 | 12.3 (10.8, 14.1) | 11.1 (9.9, 12.6)  |
| <b>65-74</b>                  |                                     |                   |                     |                                               |                |                                 |                   |                   |
| Healthy                       | 9.6 (8.4, 10.9)                     | 7.3 (6.0, 8.8)    | 7.5 (6.4, 8.8)      | 24% (4%, 39%)                                 | 22% (4%, 37%)  | —                               | —                 | —                 |
| At-Risk                       | 35.6 (32.7, 38.6)                   | 29.8 (26.6, 33.3) | 26.8 (24.3, 29.6)   | 16% (4%, 27%)                                 | 25% (14%, 34%) | 3.7 (3.2, 4.3)                  | 4.1 (3.3, 5.1)    | 3.6 (3.0, 4.3)    |
| High-Risk                     | 72.4 (66.0, 79.5)                   | 68.1 (60.6, 76.6) | 64.7 (58.6, 71.5)   | 6% (-9%, 19%)                                 | 11% (-2%, 22%) | 7.5 (6.4, 8.9)                  | 9.3 (7.5, 11.6)   | 8.6 (7.2, 10.4)   |
| <b>≥75</b>                    |                                     |                   |                     |                                               |                |                                 |                   |                   |
| Healthy                       | 24.4 (22.2, 26.8)                   | 20.2 (17.5, 23.3) | 22.9 (20.2, 26.0)   | 17% (2%, 30%)                                 | 6% (-10%, 20%) | —                               | —                 | —                 |
| At-Risk                       | 68.3 (64.4, 72.4)                   | 64.1 (59.3, 69.3) | 66.3 (62.0, 70.9)   | 6% (-3%, 15%)                                 | 3% (-6%, 11%)  | 2.8 (2.5, 3.1)                  | 3.2 (2.7, 3.7)    | 2.9 (2.5, 3.3)    |
| High-Risk                     | 97.0 (90.2, 104.2)                  | 91.0 (82.9, 99.8) | 101.5 (94.2, 109.5) | 6% (-6%, 17%)                                 | -5% (-16%, 6%) | 4.0 (3.5, 4.5)                  | 4.5 (3.8, 5.3)    | 4.4 (3.8, 5.1)    |
